# Supplementary material
Source: PubMed Central journal article supplement (PMC4018867)
Supplement: AEM.04160-13_zam999105395so1.pdf [file AEM.04160-13_zam999105395so1.pdf]

**Fig. S1.** Gamma-glutamylmethylamide (GMA) chemical synthesis

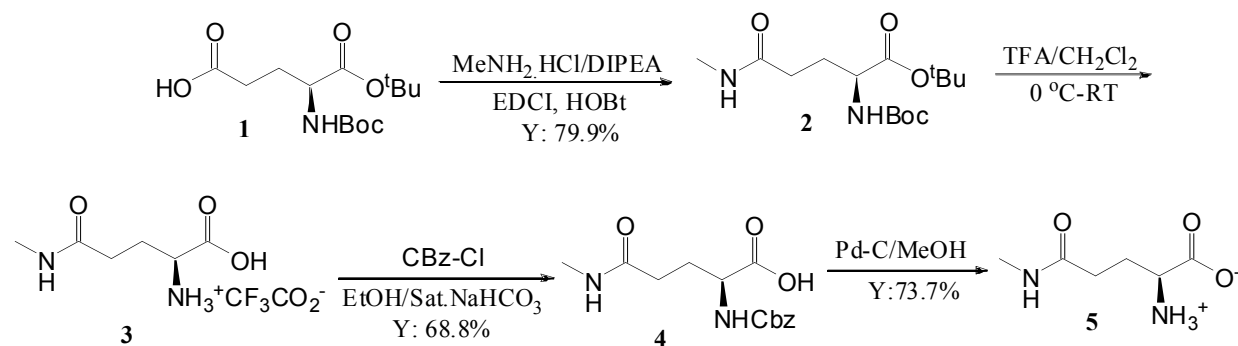

**(S)-tert-butyl 2-((tert-butoxycarbonyl)amino)-5-(methylamino)-5-oxopentanoate (2):** To a stirred solution of (S)-5-(tert-butoxy)-4-((tert-butoxycarbonyl)amino)-5-oxopentanoic acid **1** (2 g, 6.598 mmol) in CH<sub>2</sub>Cl<sub>2</sub> (20 mL) at 0 °C, 1-ethyl-3-(3'-dimethylaminopropyl)carbodiimide (EDCI, 1.517 g, 7.918 mmol) and 1-hydroxybenzotriazole (HOBt monohydrate, 1.211 g, 7.918 mmol) were added. After 10 minutes of stirring, methylamine hydrochloride (MeNH<sub>2</sub>.HCl, 0.294 g, 9.897 mmol) and diisopropylethylamine (DIPEA, 2.30 mL, 13.196 mmol) were added, and stirring was maintained overnight. The reaction mixture was then diluted with CH<sub>2</sub>Cl<sub>2</sub> (20 mL), subsequently washed with saturated aqueous NaHCO<sub>3</sub> solution (2 × 10 mL), 1N aqueous KHSO<sub>4</sub> solution (2 × 10 mL), water (10 mL), and brine (10 mL), dried over MgSO<sub>4</sub>, and the solvent concentrated under reduced pressure. The residue was purified by column chromatography on silica gel, eluting with 30 to 60% EtOAc in cyclohexane to afford **2** (1.66 g, 79.9%) as a white solid. <sup>1</sup>H NMR (300 MHz, CDCl<sub>3</sub>): δ 6.24 (brs, 1H), 5.27 (d, *J* = 7.6 Hz, 1H), 4.25-4.08 (m, 1H), 2.85 (d, *J* = 4.8 Hz, 3H), 2.35-2.11 (m, 1H), 2.01-1.79 (m, 1H), 1.49 (s, 9H), 1.48 (s, 9H); <sup>13</sup>C NMR (75 MHz CDCl<sub>3</sub>): δ 172.8, 171.4, 155.9, 82.0, 79.8, 53.6, 32.5, 29.2, 28.2, 27.9, 26.2; ESI-MS: *m/z* 654.9 [2M+Na]<sup>+</sup>, 339.0 [M+Na]<sup>+</sup>, 316.9 [M+H]<sup>+</sup>.

**(S)-2-(((benzyloxy)carbonyl)amino)-5-(methylamino)-5-oxopentanoic acid (4):**

Compound **2** (1.50 g, 4.743 mmol) was treated with trifluoroacetic acid (TFA, 15 mL) at 0 °C and allowed to stir at RT until completion of the reaction. TFA was concentrated under reduced pressure, co-evaporated with cyclohexane, and the residue was dried under high vacuum. The resulting TFA salt **3** was dissolved in ethanol (EtOH, 10 mL) cooled to 0 °C, saturated aqueous NaHCO<sub>3</sub> (10 mL) followed by

benzyl chloroformate (CbZ-Cl, 1.01 mL, 7.114 mmol) were added (reaction mixture P<sup>H</sup> = 8-9) and the resulting mixture stirred for 24 h. The aqueous layer was washed with diethyl ether (2x 10 mL), acidified with KHSO<sub>4</sub>, extracted with ethyl acetate (EtOAc, 4 x 20 mL), dried over MgSO<sub>4</sub> and the solvent concentrated under reduced pressure. The residue was purified by column chromatography on silica gel, eluting with 80 to 100% EtOAc in cyclohexane to afford **4** (0.96 g, 68.8%) as a solid. <sup>1</sup>H NMR (300 MHz, CDCl<sub>3</sub>): δ 7.49-7.33 (m, 5H), 6.94 (brs, 1H), 6.32 (s, 1H), 6.00 (d, *J* = 6.9 Hz, 1H), 5.13 (s, 2H), 4.36 (dd, *J* = 12.7, 6.8 Hz, 1H), 2.83 (d, *J* = 4.7 Hz, 3H), 2.54-2.32 (m, 2H), 2.31-2.15 (m, 1H), 2.14-1.99 (m, 1H); <sup>13</sup>C NMR (75 MHz CDCl<sub>3</sub>): δ 174.6, 174.3, 156.7, 136.1, 128.5, 128.1, 127.9, 67.0, 32.0, 28.3, 26.4; ESI-MS: *m/z* 610.8 [2M+Na]<sup>+</sup>, 317.1 [M+Na]<sup>+</sup>, 295.0 [M+H]<sup>+</sup>.

**(S)-2-ammonio-5-(methylamino)-5-oxopentanoate (5)**: To a stirred solution of compound **4** (0.96 g, 3.264 mmol) in methanol (MeOH, 30 ml) at RT, 10% Pd-C (0.15 g) catalyst was added and the reaction was stirred overnight under a H<sub>2</sub> gas atmosphere. The reaction mixture was filtered over Millipore filter paper, the filter washed subsequently with MeOH (20 mL) and water (30 mL), and the MeOH and water solutions collected separately. The MeOH solution was evaporated, the resulting solid washed in EtOAc (10 mL) under stirring, filtered, dissolved in water (20 mL), combined with the water washing, and lyophilized to afford compound **5** (0.385 g, 73.7%) as a white solid. <sup>1</sup>H NMR (300 MHz, D<sub>2</sub>O): δ 3.68 (t, *J* = 6.1 Hz, 1H), 2.65 (s, 3H), 2.37-2.28 (m, 2H), 2.10-2.00 (m, 2H); <sup>13</sup>C NMR (75 MHz D<sub>2</sub>O): δ 175.1, 173.9, 54.1, 31.4, 26.4, 25.9; ESI-MS: *m/z* 161.0 [M+H]<sup>+</sup>.

**Table S1.** List of primer sets and PCR specifications

| Use and target                         | Sequence (5' -> 3') <sup>a</sup>          |                                                | Product size (bp) | Tm (°C) |
|----------------------------------------|-------------------------------------------|------------------------------------------------|-------------------|---------|
|                                        | Forward primer (localization)             | Reverse primer (localization)                  |                   |         |
| Cloning in pCM80 <sup>b</sup>          |                                           |                                                |                   |         |
| METDI2327                              | cgattctagaTTTTTCTTTTGTGGCGatgg (2224946)  | tgcactaGATCGAGCAACCGACCTCAT (2226415)          | 1488              | 63      |
| METDI4690                              | agattctagaAATGGGCCACGCGAACGAC (4574476)   | tcagctagaCTAGAACAGGTGGCTGTAGC (4573139)        | 1394              | 65      |
| Site directed-mutagenesis <sup>c</sup> |                                           |                                                |                   |         |
| ΔMETDI2324-2327, left                  | tgcactgaGGTTCCTGCACAACCAGATT(2221393)     | gatcgcttaCGGCGCCGCCCGTCCGTT (2221922-2221940)  | 556               | 62      |
| ΔMETDI2324-2327, right                 | gcgcgTGAGCGATCCTCCGGCATCC (2226294)       | attagagctCACCGGCGTACCAGAATG (2226775-2226792)  | 504               | 67      |
| ΔMETDI2319-2322, left                  | aaactgaGGGATCGGCTGTCTCTGG (2214937)       | ATGCCGGCCGACctagacat (2215370-2215391)         | 455               | 64      |
| ΔMETDI2319-2322, right                 | ggtcgggcccGCATGGGGTCAGCCGCTCTTG (2220564) | tggatccGACGGCGACGTCGGTGAG (2221011-2221028)    | 465               | 64      |
| ΔMETDI4690, left                       | atgctcagaAATGGGGTTTCGATGTCT (4572648)     | agcctgaTAGGCGGAGGCTCCCATGAA (4573103-4573122)  | 491               | 64      |
| ΔMETDI4690, right                      | tcgcctaTTCAGGCTCTGGCATGGG (4574494)       | tgcactagaAAGCCAAGCTACCATTCCG (4574968-4574987) | 511               | 64      |
| RT-PCR                                 |                                           |                                                |                   |         |
| METDI2317/METDI2319                    | CGAGATCATCAACAAGCCCTA (2214507)           | CCGAGTTCGGCTATGAGGTC (2215313)                 | 807               | 54      |
| METDI2318/METDI2319                    | GGGATGCTGGCTGGTCTCAC (2214719)            | CGACTTACAAACGGCTCTCG (2215732)                 | 1014              | 61      |
| METDI2319/METDI2320                    | GCGAGAGCCGTTTGTAAAGTC (2215712)           | GAAATCAACGGCCAGACCAC (2216293)                 | 582               | 62      |
| METDI2320/METDI2322                    | AAGCGTGGTCTGATGTGTCG (2218366)            | TTCTGCTTCGCTCACCTGAT (2219445)                 | 1080              | 60      |
| METDI2322/METDI2323                    | GCGTCCGAGTGGTACAGGTT (2220194)            | GTGCCACCAGCGATAGAGTT (2220962)                 | 769               | 61      |
| METDI2323/METDI2324                    | TGCCGGACTTTCCGCTGATG (2220868)            | CGGTTCAGCTTCGGATTCT (2221988)                  | 1141              | 61      |
| METDI2324/METDI2325                    | ATGTGCGGTATTGTCCGACT (2221941)            | ACGGTCCAGTGGGTCTCGTT (2222970)                 | 1030              | 61      |
| METDI2325/METDI2326                    | CTGCGTCGAGAAAGATGTC (2223406)             | CGAGGGCAGGTACTGGTAGA (2224011)                 | 606               | 61      |
| METDI2326/METDI2327                    | CACCTGCACAACCTCGAAC (2224795)             | GTGCCGAACAGATCGGTGTA (2225077)                 | 283               | 57      |
| METDI2327/METDI2328                    | CATGTACACCGACGGACACA (2226089)            | AAGAGGATTACGGCCATCAC (2226694)                 | 606               | 57      |
| METDI2318                              | GGGATGCTGGCTGGTCTCAC (2214719)            | GTGTGTTGAACGGGAAGGCC (2215124)                 | 406               | 60      |
| METDI2320                              | CATGACGTAATGGGTCTCG (2216713)             | CCGGTCTTCACCTCGATT (2217616)                   | 904               | 59      |
| METDI2323                              | TGCCGGACTTTCCGCTGATG (2220868)            | GTGCAGGTAATGCCGGTGA (2221625)                  | 758               | 59      |
| METDI2324                              | ATGTGCGGTATTGTCCGACT (2221941)            | CTCCCACCGGTAGACCTTG (2222837)                  | 897               | 59      |
| METDI2327                              | CGCGGCATCAAGTAITTCCT (2225031)            | TGTTGCCCGTATAGGTCACG (2225931)                 | 901               | 60      |
| METDI1560                              | GCCCTGATAGATCACGAAGG (1425068)            | GAGGAGTGGATCTCCGACAA (1425904)                 | 837               | 56      |
| METDI1773                              | GCATCACCTCGAACATCACG (1646466)            | GTAATCTCGGCCGGTCTTC (1647696)                  | 331               | 60      |
| METDI3639                              | GCCGACAAGATCATCCAAGA (3582273)            | GGTTGTAGAAGCCACGGACT (3582417)                 | 145               | 55      |
| METDI4690                              | TCGCCCTCAAGAAATGTGCTG (4574140)           | TGGTGGGATGAACCTCTCG (4573213)                  | 966               | 60      |

<sup>a</sup>, Sequence written in capital case hybridize with *M. extorquens* DM4 chromosome (nucleotide position as defined in MaGe). Sequence in lower case and underlined correspond to restriction sites: tctaga (XbaI); ctgcag (PstI); gagctc (SacI); gagctc (AatII)

<sup>b</sup>, For plasmids pME8280 (*gmaS*, chromosome nucleotide positions 2224946-2226415) and pME8285 (METDI4690, 4574476-4573139)

<sup>c</sup>, For construction of plasmids pME8282 (nucleotide positions 4573123-4574493 deletion in the chromosome of strain DM4, strain DM4Δmetdi4690), pME8283 (position 2221941-2226293, strain DM4Δ*mgs-gmaS*) and pME8284 (position 2215392-2220563, mutant DM4Δ*mgd*)

**Table S2.** Protein comparison of *gmaS* homologs and representatives of the three known types of glutamine synthetase (GS)

| Strain                                          | Homolog affiliation | aa identity (%)        |                        | Length (aa) | Accession number |
|-------------------------------------------------|---------------------|------------------------|------------------------|-------------|------------------|
|                                                 |                     | METDI2327 <sup>a</sup> | METDI4690 <sup>b</sup> |             |                  |
| <i>Acidithiobacillus ferrivorans</i> SS3        | METDI4690           | 38                     | 66                     | 453         | YP_004784771     |
| <i>Acidithiobacillus ferrooxidans</i>           | GS type I           | 31                     | 34                     | 468         | P07804           |
| <i>Bacteroides fragilis</i>                     | GS type III         | 29                     | 27                     | 729         | AAA62314         |
| <i>Clostridium acetobutylicum</i> DSM 1731      | GS type III         | 29                     | 27                     | 696         | AEI33778         |
| <i>Coraliomargarita akajimensis</i> DSM 45221   | METDI4690           | 39                     | 67                     | 472         | YP_003549260     |
| <i>Cyanobium</i> sp. PCC7001                    | METDI4690           | 42                     | 55                     | 461         | WP_006911610     |
| <i>Dechloromonas aromatica</i> RCB              | METDI4690           | 40                     | 79                     | 453         | YP_283306        |
| <i>Escherichia coli</i> K12                     | GS type I           | 29                     | 34                     | 469         | AAC76867         |
| <i>Frankia alni</i>                             | GS type II          | 22                     | 23                     | 352         | AAA62803         |
| <i>Geobacter bemiidjensis</i>                   | GS type III         | 26                     | 29                     | 695         | YP_002139877     |
| <i>Halothiobacillus neapolitanus</i> c2         | METDI4690           | 40                     | 69                     | 461         | YP_003262690     |
| <i>Homo sapiens</i>                             | GS type II          | 23                     | 35                     | 373         | AAS57904         |
| <i>Hyphomicrobium</i> sp. MC1                   | METDI4690           | 58                     | 80                     | 459         | YP_004676841     |
|                                                 | GMAS                | 68                     | 39                     | 435         | YP_004678139     |
| <i>Methylobacillus flagellatus</i> KT           | GMAS                | 41                     | 42                     | 459         | YP_544567        |
|                                                 | METDI4690           | 39                     | 77                     | 453         | YP_545964        |
| <i>Methylobacterium extorquens</i> DM4          | GMAS                | 100                    | 39                     | 432         | YP_003067875     |
|                                                 | GS type I           | 30                     | 27                     | 481         | YP_003068149     |
|                                                 | GS type II          | 25                     | 27                     | 348         | YP_003068665     |
|                                                 | GS type I           | 30                     | 26                     | 469         | YP_003068666     |
|                                                 | METDI4690           | 39                     | 100                    | 457         | YP_003070133     |
| <i>Methylobacterium radiotolerans</i> JCM2831   | GMAS                | 85                     | 40                     | 432         | YP_001757450     |
| <i>Methylocella silvestris</i> BL2              | GS type I           | 36                     | 27                     | 469         | ACK49401         |
|                                                 | GMAS                | 68                     | 38                     | 435         | ACK51558         |
| <i>Methylococcus capsulatus</i> str. Bath       | GS type I           | 29                     | 28                     | 469         | P15124           |
| <i>Methyloversatilis universalis</i> FAM5       | GMAS                | 42                     | 42                     | 442         | ADH10360         |
| <i>Methylovorus glucosetrophus</i> SIP3-4       | GMAS                | 41                     | 43                     | 454         | YP_003052188     |
|                                                 | METDI4690           | 39                     | 78                     | 444         | YP_003050724     |
| <i>Methylovorus mays</i> n <sup>o</sup> 9       | GMAS                | 41                     | 43                     | 444         | BAF99006         |
|                                                 | METDI4690           | 41                     | 44                     | 453         | YP_638042        |
| <i>Mycobacterium</i> sp. MCS                    | GMAS                | 44                     | 42                     | 436         | YP_642052        |
|                                                 | METDI4690           | 40                     | 51                     | 451         | YP_642501        |
| <i>Parvibaculum lavamentivorans</i> DS-1        | METDI4690           | 35                     | 44                     | 458         | YP_001412913     |
| <i>Prevotella bryantii</i> B14                  | GS type III         | 31                     | 24                     | 729         | AAL87245         |
| <i>Pseudomonas stutzeri</i> A1501               | METDI4690           | 42                     | 53                     | 454         | YP_001172508     |
| <i>Ralstonia eutropha</i> H16                   | GMAS                | 44                     | 43                     | 464         | YP_841703        |
| <i>Saccharomyces cerevisiae</i>                 | GS type II          | 28                     | 23                     | 346         | AAA34644         |
| <i>Sideroxydans lithotrophicus</i> ES-1         | METDI4690           | 40                     | 77                     | 453         | YP_003522723     |
| <i>Streptomyces viridochromogenes</i>           | GS type II          | 29                     | 26                     | 343         | P19432           |
| <i>Synechococcus</i> sp. CB205                  | METDI4690           | 42                     | 53                     | 452         | WP_010317406     |
| <i>Synechococcus</i> sp. WH5701                 | METDI4690           | 41                     | 54                     | 461         | WP_006172961     |
| <i>Synechocystis</i> sp. PCC 6803               | GS type III         | 24                     | 28                     | 724         | NP441832         |
|                                                 | GS type I           | 37                     | 36                     | 473         | P77961           |
| <i>Thioalkalivibrio sulphidophilus</i> HL-EbGr7 | GMAS                | 42                     | 43                     | 444         | YP_002513768     |
|                                                 | METDI4690           | 40                     | 77                     | 455         | YP_002515141     |
| <i>Thiomicrospira crunogena</i> XCL-2           | GMAS                | 42                     | 41                     | 444         | YP_391616        |
|                                                 | METDI4690           | 41                     | 72                     | 451         | YP_392064        |

<sup>a</sup>, *M. extorquens* DM4 (accession number YP\_003067875)<sup>b</sup>, *M. extorquens* DM4 (accession number YP\_003070133)
